# Supplementary material
Source: publisher site journal article supplement (https://www.spandidos-publications.com/7666/downloadSupplementary)
Supplement: Supplementary file 1 [file downloadSupplementary]

## Sheet: SupTab1
Supplemental Table S1. Gene list of CGPs.
Gene/Panel		OCA-V3	OPA
ABL1		0	0
ACVR1B		0	0
AKT1		1	1
AKT2		1	1
AKT3		1	1
ALK		1	1
ALOX12B		0	0
AMER1		0	0
APC		0	0
AR		1	1
ARAF		1	1
ARFRP1		0	0
ARID1A		1	0
ASXL1		0	0
ATM		1	0
ATR		1	0
ATRX		1	0
AURKA		0	0
AURKB		0	0
AXIN1		0	0
AXL		1	0
BAP1		1	0
BARD1		0	0
BCL2		0	0
BCL2L1		0	0
BCL2L2		0	0
BCL6		0	0
BCOR		0	0
BCORL1		0	0
BCR		0	0
BRAF		1	1
BRCA1		1	0
BRCA2		1	0
BRD4		0	0
BRIP1		0	0
BTG1		0	0
BTG2		0	0
BTK		1	0
C11orf30		0	0
CALR		0	0
CARD11		0	0
CASP8		0	0
CBFB		0	0
CBL		1	0
CCND1		1	0
CCND2		1	0
CCND3		1	0
CCNE1		1	0
CD22		0	0
CD274		0	1
CD70		0	0
CD74		0	0
CD79A		0	0
CD79B		0	0
CDC73		0	0
CDH1		0	0
CDK12		1	0
CDK2		1	0
CDK4		1	1
CDK6		1	0
CDK8		0	0
CDKN1A		0	0
CDKN1B		1	0
CDKN2A		1	1
CDKN2B		1	0
CDKN2C		0	0
CEBPA		0	0
CHEK1		1	0
CHEK2		1	1
CIC		0	0
CREBBP		1	0
CRKL		0	0
CSF1R		1	0
CSF3R		0	0
CTCF		0	0
CTNNA1		0	0
CTNNB1		1	1
CUL3		0	0
CUL4A		0	0
CXCR4		0	0
CYP17A1		0	0
DAXX		0	0
DDR1		0	0
DDR2		1	0
DIS3		0	0
DNMT3A		0	0
DOT1L		0	0
EED		0	0
EGFR		1	1
EP300		0	0
EPHA3		0	0
EPHB1		0	0
EPHB4		0	0
ERBB2		1	1
ERBB3		1	1
ERBB4		1	1
ERCC2		1	0
ERCC4		0	0
ERG		0	0
ERRFI1		0	0
ESR1		1	1
ETV4		0	0
ETV5		0	0
ETV6		0	0
EWSR1		0	0
EZH2		1	0
EZR		0	0
FAM46C		0	0
FANCA		1	0
FANCC		0	0
FANCD2		1	0
FANCG		0	0
FANCI		1	0
FANCL		0	0
FAS		0	0
FBXW7		1	0
FGF10		0	0
FGF12		0	0
FGF14		0	0
FGF19		1	0
FGF23		0	0
FGF3		1	0
FGF4		0	0
FGF6		0	0
FGFR1		1	1
FGFR2		1	1
FGFR3		1	1
FGFR4		1	1
FH		0	0
FLCN		0	0
FLT1		0	0
FLT3		1	1
FOXL2		1	0
FUBP1		0	0
GABRA6		0	0
GATA2		1	0
GATA3		0	0
GATA4		0	0
GATA6		0	0
GID4(C17orf39)		0	0
GNA11		1	1
GNA13		0	0
GNAQ		1	1
GNAS		1	1
GRM3		0	0
GSK3B		0	0
H3-3A		1	0
H3C2		1	0
H3F3A		0	0
HDAC1		0	0
HGF		0	0
HNF1A		1	0
HRAS		1	1
HSD3B1		0	0
ID3		0	0
IDH1		1	1
IDH2		1	1
IGF1R		1	0
IKBKE		0	0
IKZF1		0	0
INPP4B		0	0
IRF2		0	0
IRF4		0	0
IRS2		0	0
JAK1		1	0
JAK2		1	0
JAK3		1	0
JUN		0	0
KDM5A		0	0
KDM5C		0	0
KDM6A		0	0
KDR		1	0
KEAP1		0	0
KEL		0	0
KIT		1	1
KLHL6		0	0
KMT2A(MLL)		0	0
KMT2D(MLL2)		0	0
KNSTRN		1	0
KRAS		1	1
LTK		0	0
LYN		0	0
MAF		0	0
MAGOH		1	0
MAP2K1		1	1
MAP2K2		1	1
MAP2K4		1	0
MAP3K1		0	0
MAP3K13		0	0
MAPK1		1	0
MAX		1	0
MCL1		0	0
MDM2		1	0
MDM4		1	0
MED12		1	0
MEF2B		0	0
MEN1		0	0
MERTK		0	0
MET		1	1
MITF		0	0
MKNK1		0	0
MLH1		1	0
MPL		0	0
MRE11		1	0
MRE11A		0	0
MSH2		1	0
MSH3		0	0
MSH6		1	0
MST1R		0	0
MTAP		0	0
MTOR		1	1
MUTYH		0	0
MYB		0	0
MYC		1	0
MYCL		1	0
MYCN		1	0
MYD88		1	0
NBN		1	0
NF1		1	0
NF2		1	0
NFE2L2		1	0
NFKBIA		0	0
NKX2-1		0	0
NOTCH1		1	0
NOTCH2		1	0
NOTCH3		1	0
NPM1		0	0
NRAS		1	1
NT5C2		0	0
NTRK1		1	1
NTRK2		1	1
NTRK3		1	1
NUTM1		0	0
P2RY8		0	0
PALB2		1	0
PARK2		0	0
PARP1		0	0
PARP2		0	0
PARP3		0	0
PAX5		0	0
PBRM1		0	0
PDCD1		0	0
PDCD1LG2		0	0
PDGFRA		1	1
PDGFRB		1	0
PDK1		0	0
PIK3C2B		0	0
PIK3C2G		0	0
PIK3CA		1	1
PIK3CB		1	0
PIK3R1		1	0
PIM1		0	0
PMS2		1	0
POLD1		0	0
POLE		1	0
PPARG		1	0
PPP2R1A		1	0
PPP2R2A		0	0
PRDM1		0	0
PRKAR1A		0	0
PRKCI		0	0
PTCH1		1	0
PTEN		1	1
PTPN11		1	0
PTPRO		0	0
QKI		0	0
RAC1		1	0
RAD21		0	0
RAD50		1	0
RAD51		1	0
RAD51B		1	0
RAD51C		1	0
RAD51D		1	0
RAD52		0	0
RAD54L		0	0
RAF1		1	1
RARA		0	0
RB1		1	0
RBM10		0	0
REL		0	0
RET		1	1
RHEB		1	0
RHOA		1	0
RICTOR		1	0
RNF43		1	0
ROS1		1	1
RPTOR		0	0
RSPO2		0	0
SDC4		0	0
SDHA		0	0
SDHB		0	0
SDHC		0	0
SDHD		0	0
SETD2		1	0
SF3B1		1	0
SGK1		0	0
SLC34A2		0	0
SLX4		1	0
SMAD2		0	0
SMAD4		1	0
SMARCA4		1	0
SMARCB1		1	0
SMO		1	1
SNCAIP		0	0
SOCS1		0	0
SOX2		0	0
SOX9		0	0
SPEN		0	0
SPOP		1	0
SRC		1	0
STAG2		0	0
STAT3		1	0
STK11		1	0
SUFU		0	0
SYK		0	0
TBX3		0	0
TEK		0	0
TERC		0	0
TERT		1	0
TET2		0	0
TGFBR2		0	0
TIPARP		0	0
TMPRSS2		0	0
TNFAIP3		0	0
TNFRSF14		0	0
TOP1		1	0
TP53		1	1
TSC1		1	0
TSC2		1	0
TYRO3		0	0
U2AF1		1	0
VEGFA		0	0
VHL		0	0
WHSC1		0	0
WHSC1L1		0	0
WT1		0	0
XPO1		1	0
XRCC2		0	0
ZNF217		0	0
ZNF703		0	0
The number 0 indicates genes that are not listed in the panels, while the number 1 indicates genes that are included in the genomic panels.
